# Supplementary material
Source: PubMed Central journal article supplement (PMC4393518)
Supplement: supp_btu804_Supplementary_Figures_and_Tables_BIOINF-2014-0870.pdf [file supp_btu804_Supplementary_Figures_and_Tables_BIOINF-2014-0870.pdf]

| SNV position   | ref/var | Junction                | VAR Junction<br>Intron Count<br>N VAR ei | VAR Junction<br>NO Intron Count<br>N VAR ee | REF Junction<br>Intron Count<br>N REF ei | REF Junction<br>NO Intron Count<br>N REF ee | SNV count | REF count | Intron count | No Intron<br>Count | Spanning<br>Reads<br>Count | SNP Loci<br>Reads<br>Count |
|----------------|---------|-------------------------|------------------------------------------|---------------------------------------------|------------------------------------------|---------------------------------------------|-----------|-----------|--------------|--------------------|----------------------------|----------------------------|
| chr21:33887131 | G/A     | chr21:33876325-33887123 | 4                                        | 12                                          | 4                                        | 15                                          | 16        | 19        | 8            | 27                 | 35                         | 55                         |

**Read counts used for computation & statistical assessment of the SNPllice score**

**Intermediate counts**

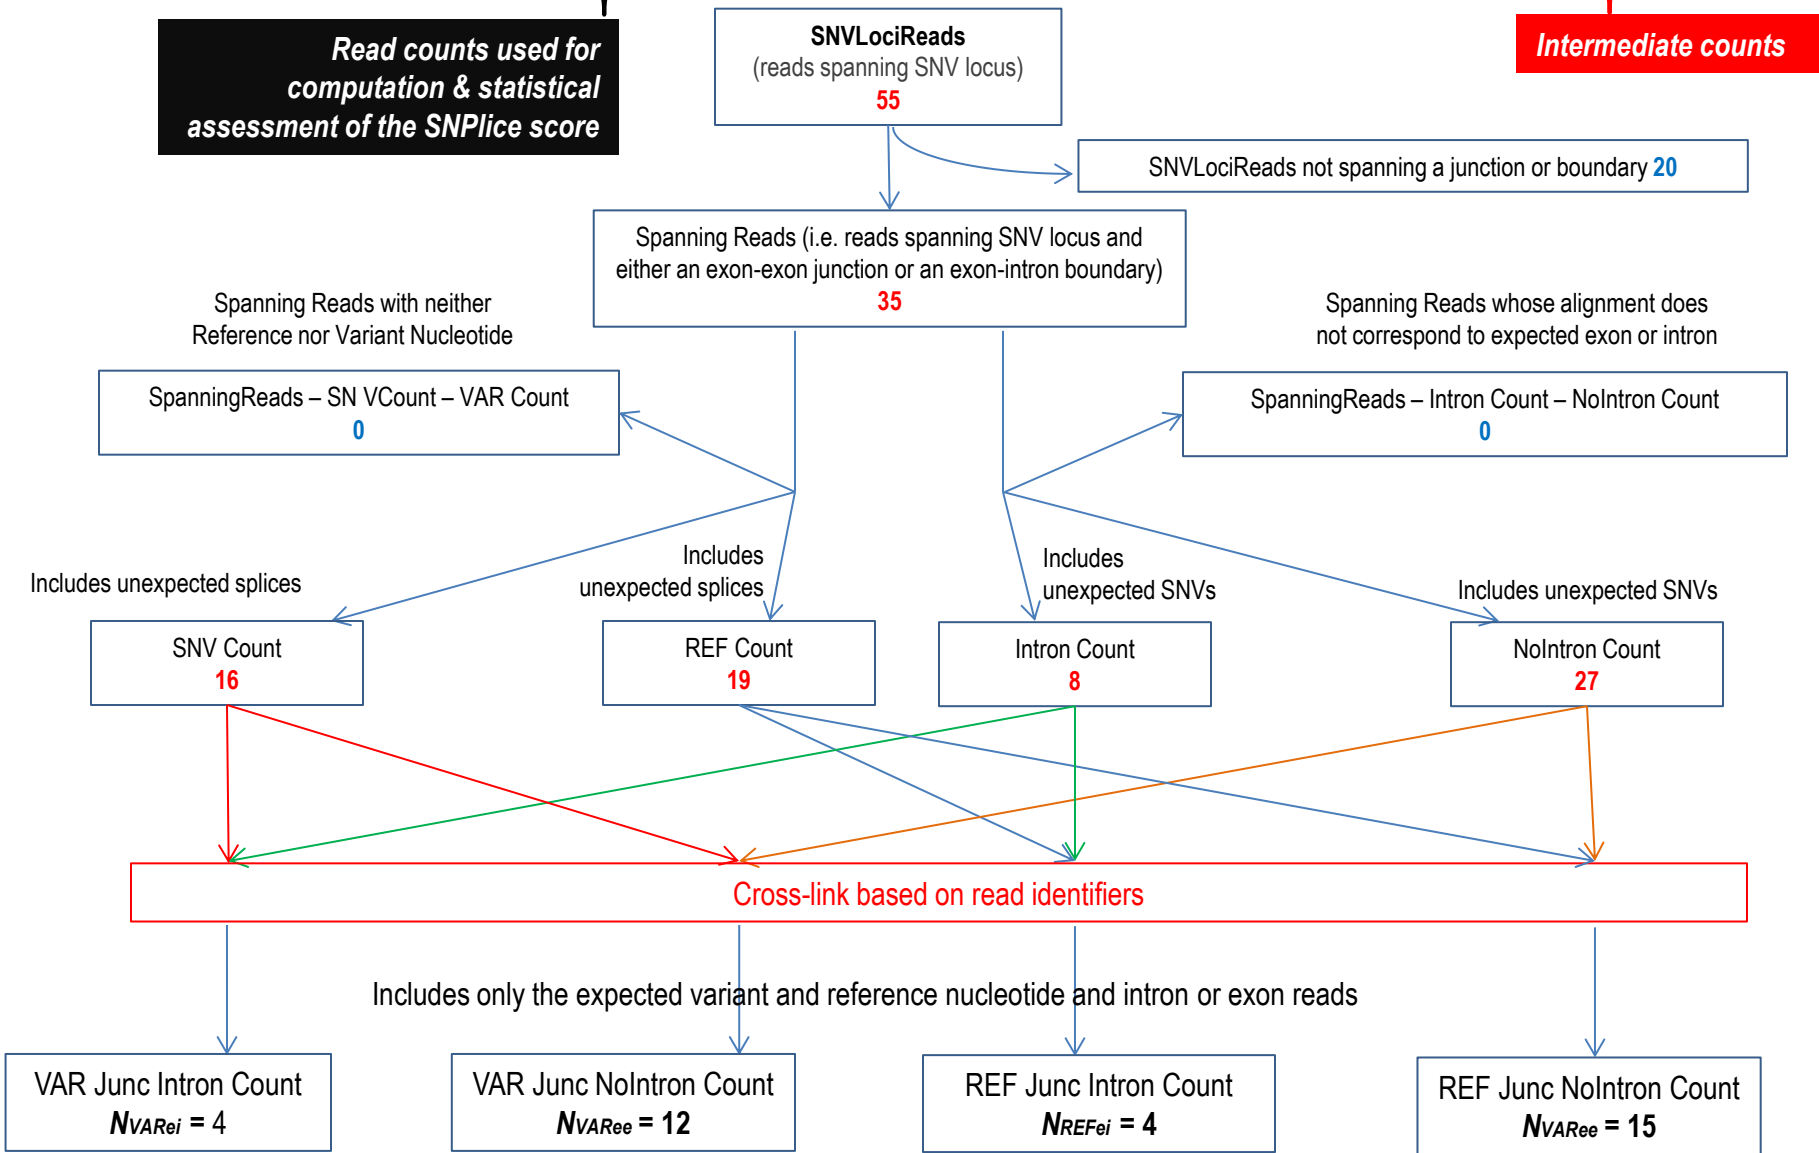

**Supplementary Figure 1.** Algorithm employed to categorize the reads used for the SNPllice computation. Part of the fields of the SNPllice output file are shown (top).

# Diagram of cases

- No star: reference; blue star: expected SNV; other stars: unexpected SNVs.
- “Readthrough” $\leftrightarrow$ (5bp)
- Reads 1,2,3,6,7,8,9,10,11 are considered “Spanning”, (i.e. reads that span SNV locus and either an exon-exon junction, or an exon-intron boundary).
- SNVCount: 2 (reads 7,11); NoSNVCount: 5 (reads 2,3,6,9,10); IntronCount: 4 (reads 8,9,10,11); NoIntronCount: 3 (reads 1,2,3)
- SNVIntron: 1 (read 11); SNVNoIntron: 0; NoSNVIntron: 2 (reads 9,10); NoSNVNoIntron 2 (2,3)

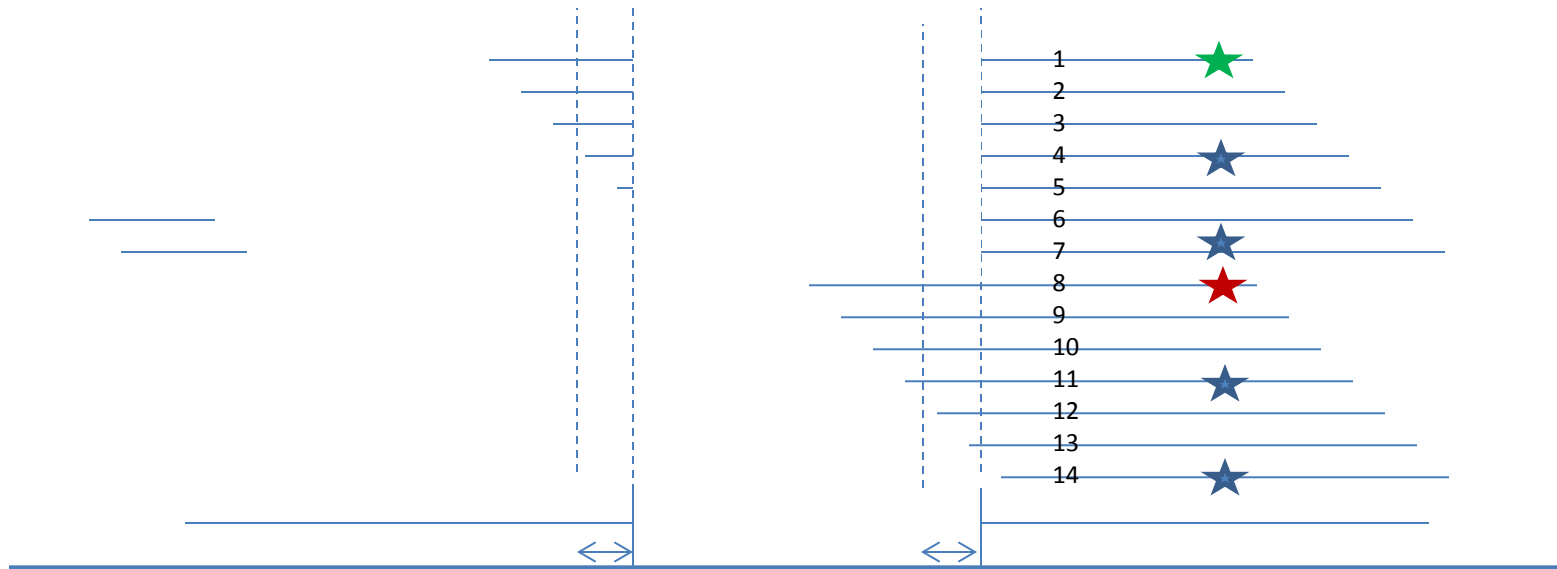

### Sequencing Depth and SNPLice Variants

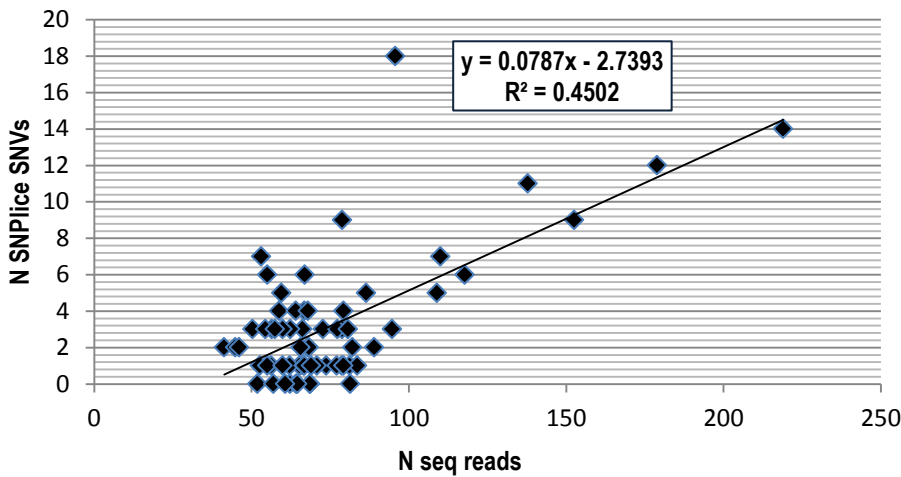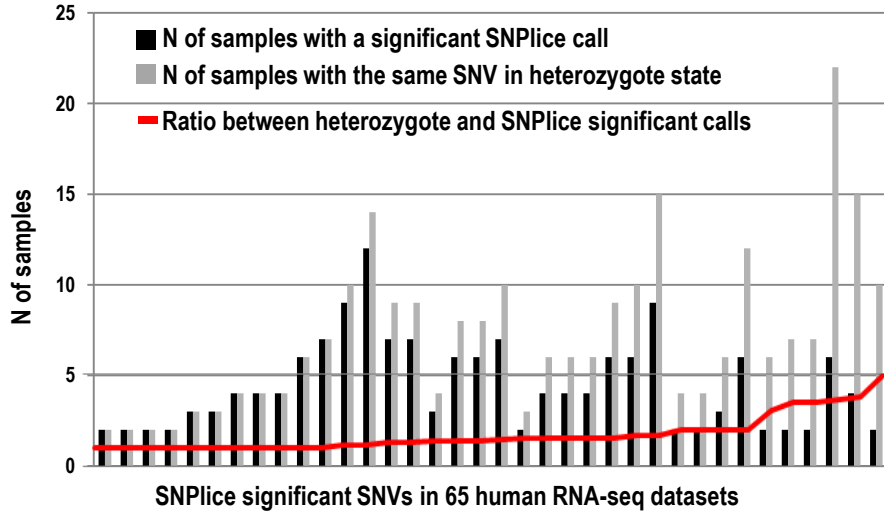

### Types of substitutions for SNVs associated with exon-intron reads

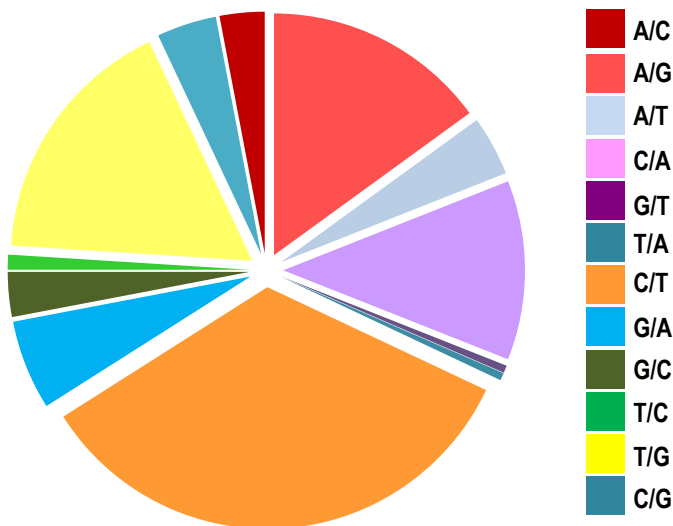

### Supplementary Figure 3. SNPLice application on 65 human RNA-seq.

**A.** Positive correlation between number of sequencing reads and number of SNPLice significant calls (corrected  $p < 0.05$ ). The read numbers are presented in millions.

**B.** Consistency of SNPLice findings across samples. The analysis includes 36 significant variants called in more than one unrelated samples. The red line indicates the ratio between the number of the samples with a heterozygote variant and the number of samples in which the variant was called significant through SNPLice. The ratio ranged between 1 (all the samples heterozygote for the corresponding variant present with significant SNPLice call) and 5 (20% of the heterozygote samples present with a significant SNPLice call for the corresponding variant).

**C.** Types substitutions highlighted by SNPLice; the most common being C>T (34%). The substitutions are in regards to the sense orientation of the gene open reading frame.

# cDNA sequence

## Key

|                |                    |                    |
|----------------|--------------------|--------------------|
| Codons         | Alternating codons | Alternating codons |
| Exons          | Alternating exons  | Alternating exons  |
| Other features | UTR                |                    |

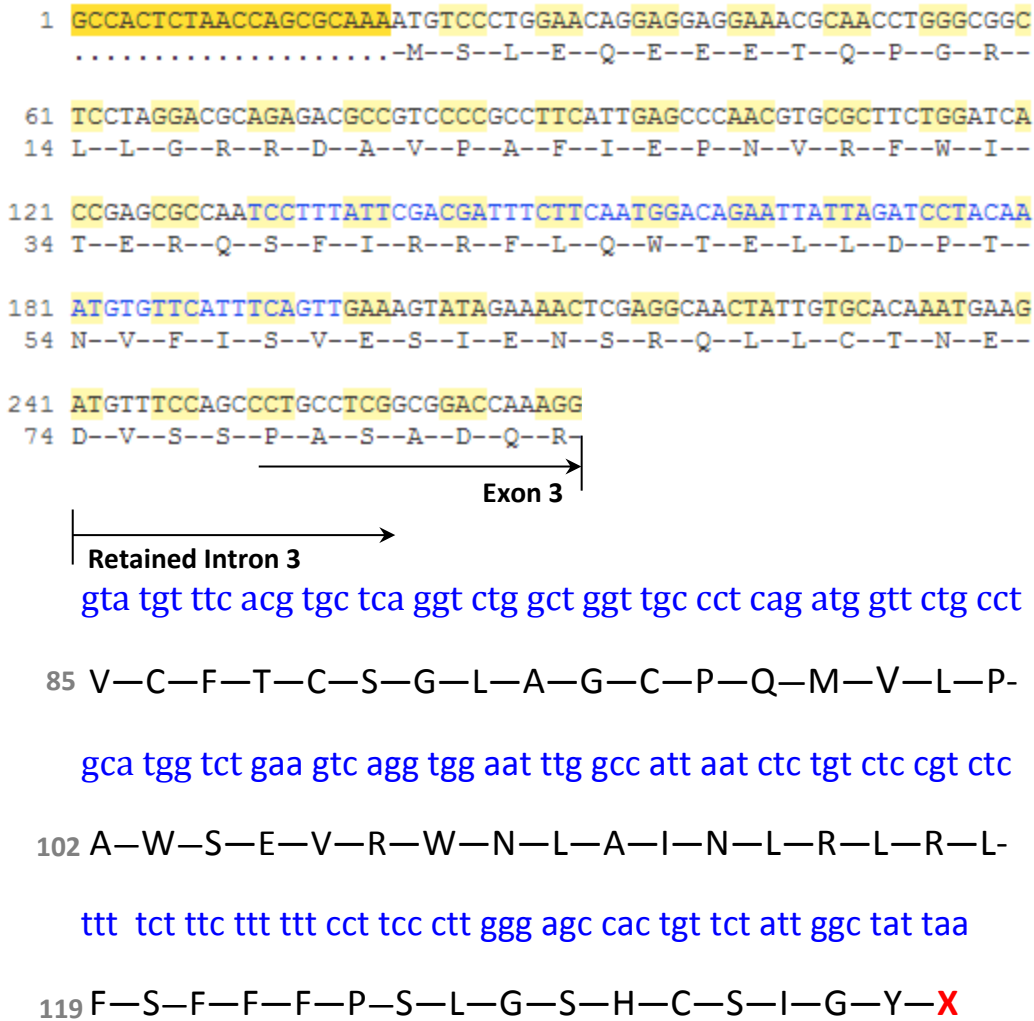

**Supplementary Figure 4.** Predicted changes in the open reading frame (ORF) and the protein structure of SFXN4 as a result of intron retention on both sides of exon 4. The predicted ORF expands 50 codons downstream of the in-frame exon 3 into intron 3, until it reaches an in-frame stop codon (TAA).

REF: chr10:120920588 T (A)

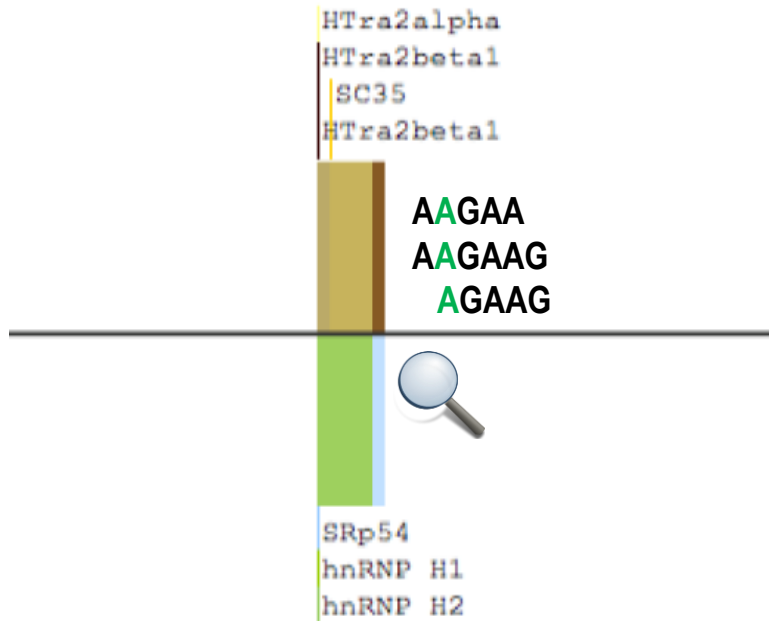

VAR: chr10:120920588 C (G)

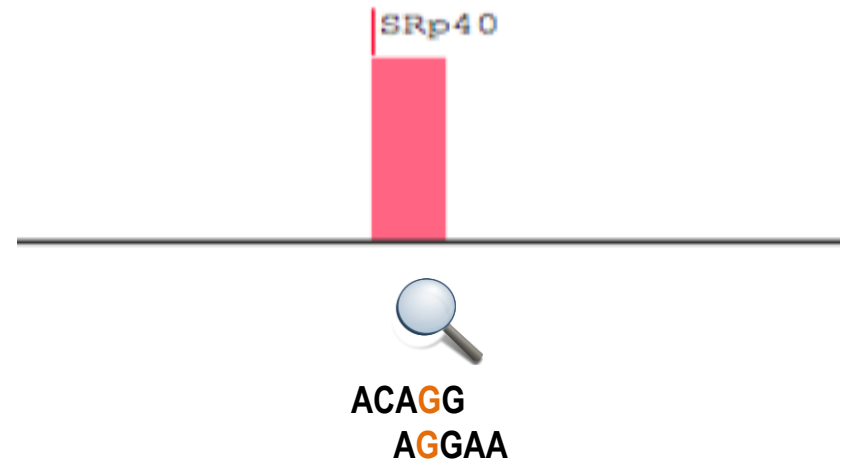

**Supplementary Figure 5.** Comparison of the binding sites for splice-regulatory molecules recognizing the wild type (left) and the variant (right) sequence for rs10749291 in SFXN4, as modeled by SpliceAid. Splice associated molecules SFRS2, SFRS10, SFRS11, TRA2A, HNRNPH1 and HNRNPH bind only the reference sequence, and two different ones (SFRS5 and SFRS9) bind the variant only. The SpliceAid sequence is in sense (in regards to the SFXN4 ORF direction).

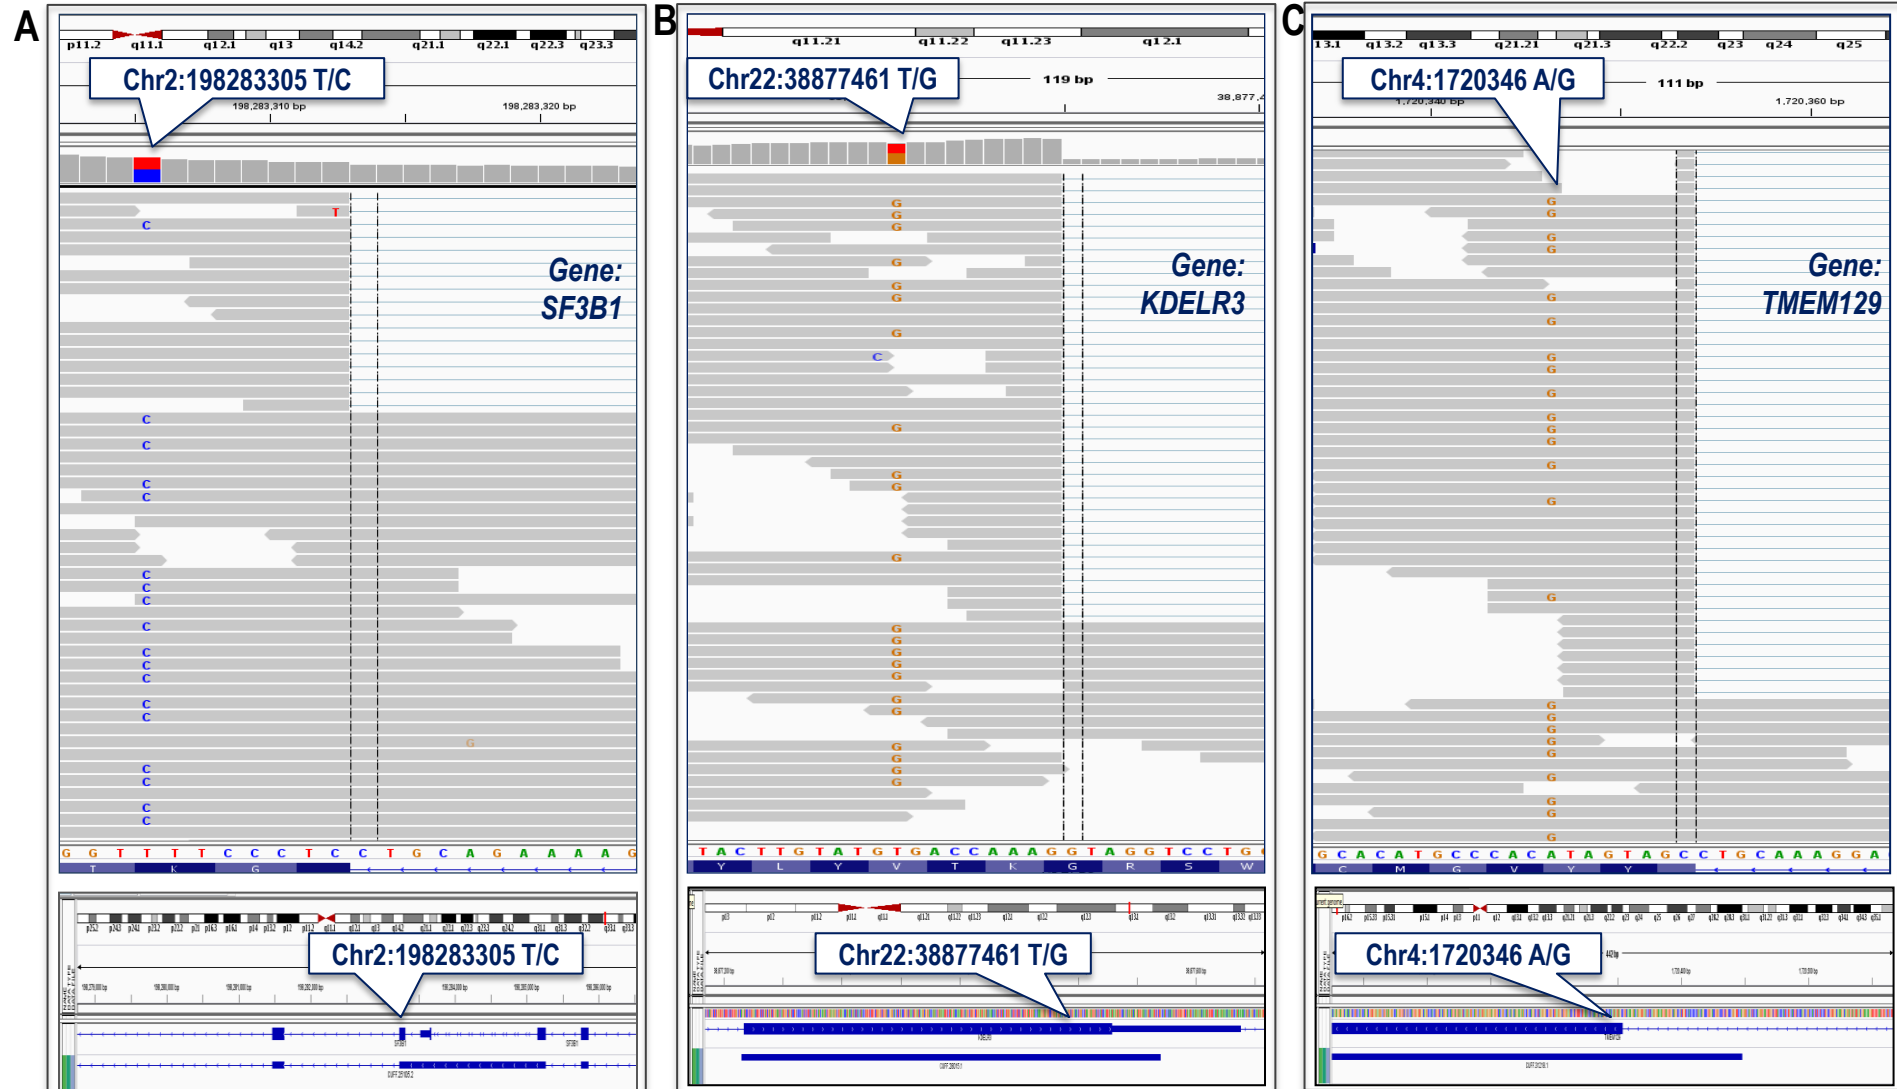

**Supplementary Figure 6. A. Upper panel:** Read alignment in the region of rs788023 (exon 5, *SF3B1*). Exclusive residing of the variant nucleotide within reads encompassing the acceptor junctions (7 nucleotides from the SNV), is seen. **Lower Panel:** IGV visualization of the Cufflinks assembly of the region of rs788023, showing the presence of an isoform retaining the intron on the acceptor side of exon. The downstream positioned exon-intron-exon structure is also retained in the isoform. **B. Upper panel:** Read alignment in the region of rs12004 (exon 4 of *KDEL3*) shows prevalent residing of the variant nucleotide within reads encompassing the acceptor site (8 nucleotides from the SNV) is seen. **Lower panel:** IGV visualization of the Cufflinks assembly of the region of rs12004 showing an alternative last exon of *KDEL3*. **C. Upper panel:** Read alignment in the region of rs11552262 (ex 2 of *TMEM129*) shows prevalent residing of the variant nucleotide within reads encompassing the acceptor junction (7 nucleotides from the SNV) is seen. This SNV' locus, containing either the reference, or the variant nucleotide, is not a binding site for known splice related molecules. **Lower panel:** IGV visualization of the reads assembly in the region of rs11552262 showing partial intron retention on the acceptor site of exon 2 of *TMEM129*.

Supplementary Figure 7. Allele-Specific Sanger Sequencing

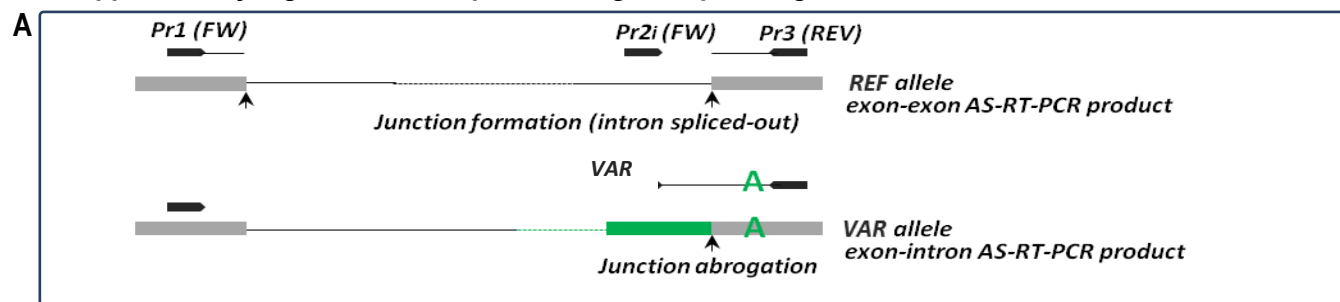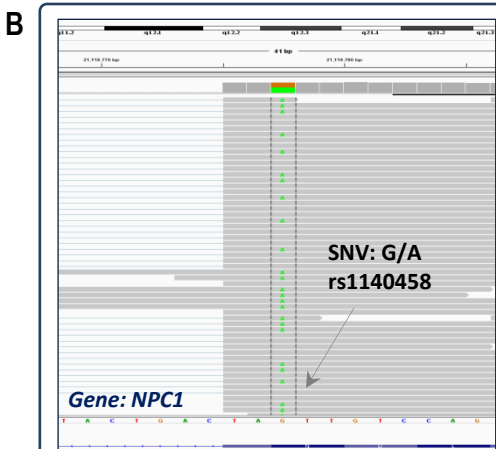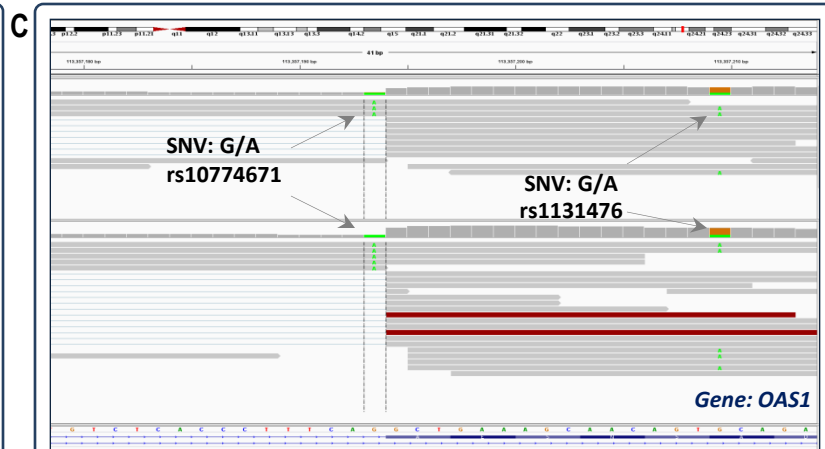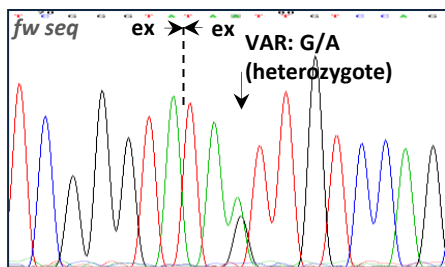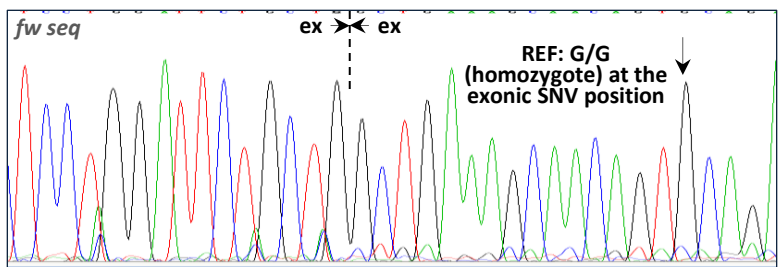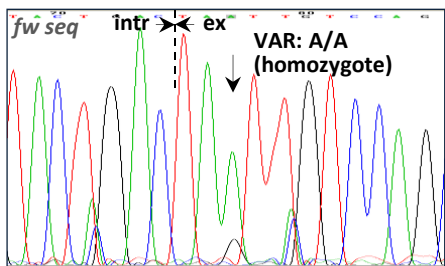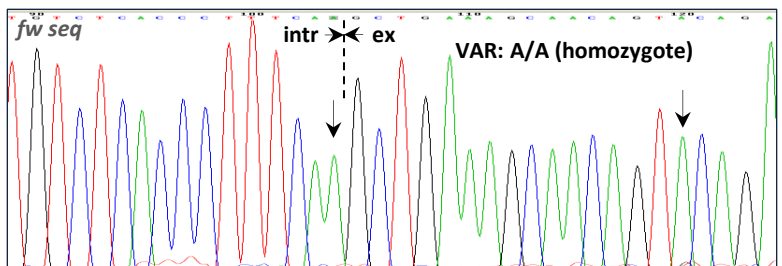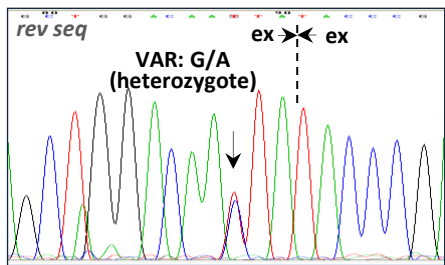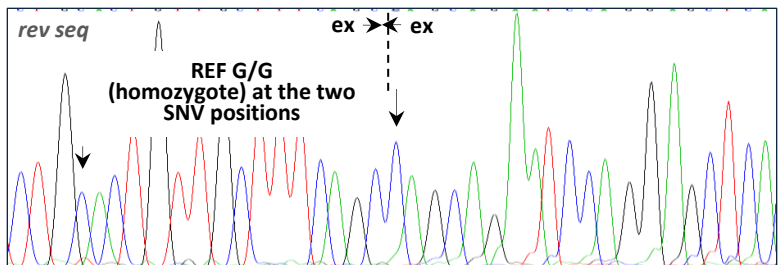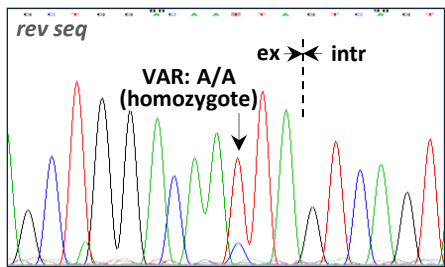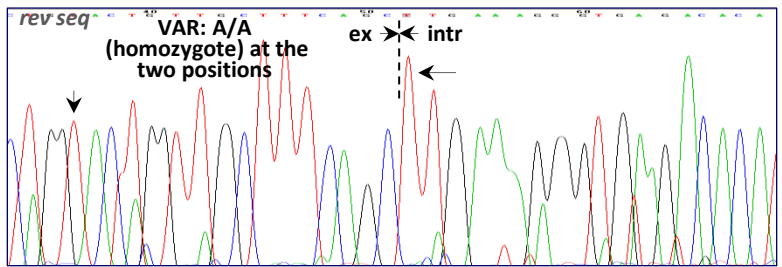

**Supplementary Figure 7 (cont.). A.** Schematic presentation of the AS-RT-PCR designed to detect co-allelic variant nucleotide and exon-intron boundary. For each allele-specific PCR, three primers were designed: a common forward exonic primer to amplify the SNV locus, and two reverse primers hybridizing in the downstream exon or intron, respectively. The example shows a variant nucleotide (A, in green) which, if splice modulating, is expected to over-dominate the reference allele in the PCR-amplicon containing the exon-intron junction. **B.** Sanger sequencing chromatograms of the allele specific amplification of the region flanking SNV rs1140458 near 3' SS of in the gene *NPC1*: The top two chromatograms show forward, and the bottom two - reverse primer Sanger sequencing of the exon-intron and exon-exon bearing RNA molecules. It is well seen that the alleles with the variant nucleotide (indicated with an arrow) predominate in the PCR amplifying exon-intron junction. In contrast, the amplicon of the canonically spliced exon-exon region (2nd from the top), shows an equal proportion of the variant and the WT allele. **C.** Sanger sequencing chromatograms of the region flanking two closely positioned SNVs in the *OAS1* gene: rs1131476 (16nt in the exon) and rs10774671 (intrinsic 3' SS). Both SNVs are homozygote variant in the PCR encompassing the exon-intron junction, indicating strong splice modulating potential of the variant allele. In contrast, the canonically spliced product harboring exon-exon junction, shows only the WT allele, indicating complete absence of correctly spliced molecules harboring the variant nucleotide(s). The result is supported by both forward (top two chromatograms), and reverse sequencing. The exonic SNV, without necessarily being involved in the splice modulation, is indicative for alteration of the junction.



**Supplementary Table 1.** Samples used to test SNPllice Performance, RNA-seq characteristics.

| #  | Sample Code | TCGA sample code | Sample Origine       | Total N Reads | Overall Mapping (%) | Concordant Alignments (%) |
|----|-------------|------------------|----------------------|---------------|---------------------|---------------------------|
| 1  | RPE1        | na               | primary cell line    | 137745484     | 0.969               | 0.872                     |
| 2  | RPE2        | na               | primary cell line    | 178865492     | 0.971               | 0.869                     |
| 3  | RPE3        | na               | primary cell line    | 109990651     | 0.97                | 0.887                     |
| 4  | RPE4        | na               | primary cell line    | 152566009     | 0.966               | 0.883                     |
| 5  | RPE5        | na               | primary cell line    | 218971451     | 0.959               | 0.882                     |
| 6  | NT1         | TCGA-BH-A0BT     | normal breast tissue | 59486476      | 0.96                | 0.862                     |
| 7  | NT2         | TCGA-BH-A0B3     | normal breast tissue | 66759317      | 0.94                | 0.842                     |
| 8  | NT3         | TCGA-BH-A0BA     | normal breast tissue | 53082144      | 0.95                | 0.862                     |
| 9  | NT4         | TCGA-BH-A0BJ     | normal breast tissue | 56191732      | 0.93                | 0.827                     |
| 10 | NT5         | TCGA-BH-A0BQ     | normal breast tissue | 56448462      | 0.94                | 0.847                     |
| 11 | NT6         | TCGA-BH-A0BS     | normal breast tissue | 68587587      | 0.95                | 0.839                     |
| 12 | NT7         | TCGA-BH-A0C3     | normal breast tissue | 65443987      | 0.96                | 0.855                     |
| 13 | NT8         | TCGA-A7-A0D9     | normal breast tissue | 73756226      | 0.97                | 0.884                     |
| 14 | NT9         | TCGA-BH-A0DD     | normal breast tissue | 67885549      | 0.97                | 0.885                     |
| 15 | NT10        | TCGA-BH-A0DV     | normal breast tissue | 72730922      | 0.95                | 0.86                      |
| 16 | NT11        | TCGA-BH-A0E1     | normal breast tissue | 51892081      | 0.94                | 0.825                     |
| 17 | NT12        | TCGA-BH-A1ET     | normal breast tissue | 95645995      | 0.96                | 0.881                     |
| 18 | NT13        | TCGA-BH-A0HA     | normal breast tissue | 62227947      | 0.96                | 0.853                     |
| 19 | NT14        | TCGA-BH-A1EU     | normal breast tissue | 41295091      | 0.96                | 0.87                      |
| 20 | NT15        | TCGA-BH-A1FM     | normal breast tissue | 81172903      | 0.95                | 0.852                     |
| 21 | NT16        | TCGA-BH-A1FU     | normal breast tissue | 44882440      | 0.96                | 0.874                     |
| 22 | NT17        | TCGA-BH-A2FF     | normal breast tissue | 88931561      | 0.95                | 0.851                     |
| 23 | NT18        | TCGA-BH-A18N     | normal breast tissue | 78830417      | 0.94                | 0.849                     |
| 24 | NT19        | TCGA-BH-A0C0     | normal breast tissue | 77311482      | 0.94                | 0.842                     |
| 25 | NT20        | TCGA-BH-A0E0     | normal breast tissue | 58775971      | 0.92                | 0.81                      |
| 26 | NT21        | TCGA-BH-A0DL     | normal breast tissue | 78830417      | 0.94                | 0.849                     |
| 27 | NT22        | TCGA-BH-A0D0     | normal breast tissue | 66233339      | 0.96                | 0.864                     |
| 28 | NT23        | TCGA-BH-A1FJ     | normal breast tissue | 94684175      | 0.95                | 0.867                     |
| 29 | NT24        | TCGA-BH-A18S     | normal breast tissue | 50296853      | 0.95                | 0.871                     |
| 30 | NT25        | TCGA-BH-A18R     | normal breast tissue | 80615943      | 0.96                | 0.879                     |
| 31 | NT26        | TCGA-BH-A0AY     | normal breast tissue | 54373442      | 0.91                | 0.804                     |
| 32 | NT27        | TCGA-BH-A0DB     | normal breast tissue | 65303269      | 0.94                | 0.853                     |
| 33 | NT28        | TCGA-BH-A0BV     | normal breast tissue | 78745529      | 0.94                | 0.847                     |
| 34 | NT29        | TCGA-BH-A0DH     | normal breast tissue | 66945837      | 0.94                | 0.835                     |
| 35 | NT30        | TCGA-BH-A0DQ     | normal breast tissue | 83623515      | 0.94                | 0.847                     |
| 36 | TP1         | TCGA-BH-A0BT     | tumor breast tissue  | 55004971      | 0.95                | 0.854                     |
| 37 | TP2         | TCGA-BH-A0B3     | tumor breast tissue  | 68221259      | 0.94                | 0.843                     |
| 38 | TP3         | TCGA-BH-A0BA     | tumor breast tissue  | 65552046      | 0.95                | 0.866                     |
| 39 | TP4         | TCGA-BH-A0BJ     | tumor breast tissue  | 64112433      | 0.96                | 0.87                      |
| 40 | TP5         | TCGA-BH-A0BQ     | tumor breast tissue  | 52660375      | 0.96                | 0.873                     |
| 41 | TP6         | TCGA-BH-A0BS     | tumor breast tissue  | 70793519      | 0.96                | 0.867                     |
| 42 | TP7         | TCGA-BH-A0C3     | tumor breast tissue  | 62082509      | 0.96                | 0.871                     |
| 43 | TP8         | TCGA-A7-A0D9     | tumor breast tissue  | 62308445      | 0.94                | 0.832                     |
| 44 | TP9         | TCGA-BH-A0DD     | tumor breast tissue  | 64107647      | 0.95                | 0.859                     |
| 45 | TP10        | TCGA-BH-A0DV     | tumor breast tissue  | 86417764      | 0.97                | 0.883                     |
| 46 | TP11        | TCGA-BH-A0E1     | tumor breast tissue  | 59934510      | 0.95                | 0.867                     |
| 47 | TP12        | TCGA-BH-A1ET     | tumor breast tissue  | 108899128     | 0.96                | 0.883                     |
| 48 | TP13        | TCGA-BH-A0HA     | tumor breast tissue  | 56969739      | 0.94                | 0.848                     |
| 49 | TP14        | TCGA-BH-A1EU     | tumor breast tissue  | 117745484     | 0.96                | 0.88                      |
| 50 | TP15        | TCGA-BH-A1FM     | tumor breast tissue  | 77091719      | 0.95                | 0.867                     |
| 51 | TP16        | TCGA-BH-A1FU     | tumor breast tissue  | 55004971      | 0.95                | 0.854                     |
| 52 | TP17        | TCGA-BH-A2FF     | tumor breast tissue  | 79237177      | 0.95                | 0.851                     |
| 53 | TP18        | TCGA-BH-A18N     | tumor breast tissue  | 66610964      | 0.96                | 0.879                     |
| 54 | TP19        | TCGA-BH-A0C0     | tumor breast tissue  | 57426535      | 0.96                | 0.871                     |
| 55 | TP20        | TCGA-BH-A0E0     | tumor breast tissue  | 46047258      | 0.93                | 0.828                     |
| 56 | TP21        | TCGA-BH-A0DL     | tumor breast tissue  | 81338216      | 0.92                | 0.826                     |
| 57 | TP22        | TCGA-BH-A0D0     | tumor breast tissue  | 66843177      | 0.96                | 0.88                      |
| 58 | TP23        | TCGA-BH-A1FJ     | tumor breast tissue  | 79248775      | 0.95                | 0.86                      |
| 59 | TP24        | TCGA-BH-A18S     | tumor breast tissue  | 67890588      | 0.96                | 0.866                     |
| 60 | TP25        | TCGA-BH-A18R     | tumor breast tissue  | 82063135      | 0.95                | 0.851                     |
| 61 | TP26        | TCGA-BH-A0AY     | tumor breast tissue  | 68989695      | 0.90                | 0.798                     |
| 62 | TP27        | TCGA-BH-A0DB     | tumor breast tissue  | 68515944      | 0.92                | 0.826                     |
| 63 | TP28        | TCGA-BH-A0BV     | tumor breast tissue  | 59906501      | 0.96                | 0.866                     |
| 64 | TP29        | TCGA-BH-A0DH     | tumor breast tissue  | 64608301      | 0.95                | 0.859                     |
| 65 | TP30        | TCGA-BH-A0DQ     | tumor breast tissue  | 60724531      | 0.94                | 0.855                     |

**Supplementary Table 2.** Primer sequences and amplicon sizes for AS-RT-PCR amplification of the surrounding exon-exon and exon-intron regions of two selected SNVs suggested modulating splicing.

| SNV                                        | Forward (FW) Primer                                             | Reverse (REV) Primer             | AS-RT-PCR size (bp) |
|--------------------------------------------|-----------------------------------------------------------------|----------------------------------|---------------------|
| 18:21119777 G/A                            | Pr1: Forward Exonic (FW_E_NPC1)<br>TGCAGAACTGGTCAGTGATATTG      | Pr3: Reverse Exonic (REV_E_NPC1) | 223                 |
|                                            | Pr2: Forward Intronic (FW_I_NPC1)<br>TTCCAAGAAAGTCTATTTTCAGTGAG | GAGGAAGGGCAGCACTACAC             | 220                 |
| chr12:113357193 G/A<br>chr12:113357209 G/A | Pr1: Forward Exonic (FW_E_OAS1)<br>CGGACCCTACAGGAACTTG          | Pr3: Reverse Exonic (REV_E_OAS1) | 288                 |
|                                            | Pr2: Forward Intronic (FW_I_OAS1)<br>AGCAGCTGGGGCTTGTAGT        | GGGTACTCATGTGTTCCAATGT           | 218                 |

**Supplementary Table 3. SNVs assessed significant through SNPlice for association with intron retention.** The annotation is performed using SeattleSeq v8.01, dbSNP build 138. DTB – Distance to Boundary.

| Chr:location<br>(hg19) | nt  | rsID     | SNPlice  |          |          |          |       |         | Annotation |                      |                |           |                         |               |     |
|------------------------|-----|----------|----------|----------|----------|----------|-------|---------|------------|----------------------|----------------|-----------|-------------------------|---------------|-----|
|                        |     |          | N VAR ei | N VAR ee | N REF ei | N REF ee | LOD   | FDR (q) | Gene       | Transcript Accession | Function       | AA change | Protein Position/Length | cDNA Position | DTB |
| chr19:54704760         | A/C | 3810232  | 43       | 0        | 0        | 26       | 12.17 | 1E-16   | RPS9       | NM_001013.3          | intron         | none      | NA                      | NA            | 4   |
| chr1:223718651         | G/A | 61823553 | 14       | 7        | 4        | 103      | 5.47  | 1E-07   | CAPN8      | NM_001143962.1       | missense       | THR,MET   | 492/604                 | 1475          | 11  |
| chr7:99955866          | G/A | 61735533 | 13       | 0        | 0        | 16       | 9.80  | 3E-06   | PILRB      | NM_178238.3          | 5-prime-UTR    | none      | NA                      | NA            | 24  |
| chr17:5289580          | A/G | 11209    | 24       | 5        | 7        | 29       | 4.13  | 3E-05   | NUP88      | NM_002532.4          | synonymous     | HIS       | 724/742                 | 2172          | 10  |
| chr7:128034629         | C/T | 2228075  | 8        | 0        | 0        | 22       | 9.58  | 6E-05   | IMPDH1     | XM_005250316.1       | synonymous     | ALA       | 319/394                 | 957           | 25  |
| chr22:21830934         | G/A | 469205   | 18       | 7        | 2        | 31       | 4.96  | 8E-05   | PI4KAP2    | NR_003700.1          | noncoding exon | none      | NA                      | 1620          | 2   |
| chr16:70164334         | A/G | 10852462 | 8        | 0        | 0        | 20       | 9.45  | 1E-04   | P DPR      | XM_005256019.1       | 5-prime-UTR    | none      | NA                      | NA            | 9   |
| chr17:73588058         | G/T | 736522   | 9        | 1        | 0        | 19       | 7.95  | 0.0006  | MYO15B     | NR_003587.2          | noncoding exon | none      | NA                      | 2359          | 1   |
| chr19:4511140          | C/G | 7255715  | 31       | 0        | 0        | 5        | 9.44  | 0.0008  | PLIN4      | XM_005259641.1       | synonymous     | GLY       | 944/1372                | 2832          | 12  |
| chr19:11688460         | T/C | 2071484  | 15       | 3        | 0        | 12       | 6.79  | 0.0014  | ACP5       | XM_005259939.1       | 5-prime-UTR    | none      | NA                      | NA            | 35  |
| chr22:22049783         | C/T | 12484060 | 18       | 0        | 10       | 15       | 5.77  | 0.0043  | PPIL2      | NM_014337.3          | 3-prime-UTR    | none      | NA                      | NA            | 3   |
| chr17:27000391         | A/G | 9904043  | 13       | 1        | 14       | 23       | 3.87  | 0.0081  | SUPT6H     | NM_003170.3          | 5-prime-UTR    | none      | NA                      | NA            | 3   |
| chr15:75130093         | T/C | 12898397 | 3        | 0        | 0        | 46       | 9.35  | 0.0092  | ULK3       | XM_005254291.1       | intron         | none      | NA                      | NA            | 2   |
| chr17:42084067         | T/C | 55708447 | 16       | 33       | 0        | 38       | 5.25  | 0.0095  | NAGS       | NM_153006.2          | synonymous     | PHE       | 362/535                 | 1086          | 11  |
| chr6:31938120          | C/T | 45531831 | 12       | 2        | 2        | 14       | 4.86  | 0.0114  | DXO        | NM_005510.3          | synonymous     | ARG       | 316/397                 | 948           | 1   |
| chr22:21830934         | G/A | 469205   | 8        | 6        | 3        | 52       | 4.29  | 0.0125  | PI4KAP2    | NR_003700.1          | noncoding exon | none      | NA                      | 1620          | 2   |
| chr2:113943470         | A/G | 2241976  | 6        | 4        | 0        | 24       | 6.15  | 0.0183  | PSD4       | XM_005263634.1       | synonymous     | GLY       | 422/1057                | 1266          | 17  |
| chr20:52788190         | G/T | 35873579 | 3        | 0        | 0        | 28       | 8.64  | 0.0204  | CYP24A1    | NM_000782.4          | synonymous     | ARG       | 157/515                 | 469           | 20  |
| chr17:73519413         | C/T | 8064529  | 12       | 5        | 1        | 15       | 4.55  | 0.0297  | TSEN54     | NM_207346.2          | missense       | ALA,VAL   | 437/527                 | 1310          | 4   |
| chr17:80585094         | C/T | 2291393  | 4        | 0        | 1        | 22       | 7.08  | 0.0328  | WDR45B     | NM_019613.3          | synonymous     | LYS       | 106/345                 | 318           | 15  |
